# Supplementary material
Source: publisher figshare collection journal article supplement (https://frontiersin.figshare.com/ndownloader/files/22198197)
Supplement: Supplementary file 1 [file 22198197]

## Sheet: Sheet1
Supplementary table 1: Sample file names and accessions. This table lists the primary EMBL accession numbers for all data files used in this study. Files beginning 'ELF' are from sediment samples and files beginning 'Blank' are negative controls (reagents only). The data is publically available.
Sample_name	Accession
ELF039_250_60_ELFN2D1	ERS3605521
ELF039_321_61_ELFN2D1	ERS3605522
ELF039_355_62_ELFN2D1	ERS3605525
ELF039_384_63_ELFN2D1	ERS3605526
ELF039_415_64_ELFN2D1	ERS3605527
ELF039_460_65_ELFN2D1	ERS3605528
ELF039_485_66_ELFN2D1	ERS3605529
Blank_B1_ELFN2D1	ERS3605537
Blank_B2_ELFN2D1	ERS3605538
Blank_B3_ELFN2D1	ERS3605539
Blank_B4_ELFN2D1	ERS3605540
Blank_B5_ELFN2D1	ERS3605541
Blank_B6_ELFN2D1	ERS3605542
Blank_B7_ELFN2D1	ERS3605543
Blank_B8_ELFN2D1	ERS3605544
Blank_B10_ELFN2D1	ERS3605545
Blank_B11_ELFN2D1	ERS3605546
Blank_B12_ELFN2D1	ERS3605547
Blank_B13_ELFN2D1	ERS3605548
Blank_B14_ELFN2D1	ERS3605549
Blank_B15_ELFN2D1	ERS3605550
Blank_B16_ELFN2D1	ERS3605551
Blank_B17_ELFN2D1	ERS3605552
Blank_B18_ELFN2D1	ERS3605553
Blank_B19_ELFN2D1	ERS3605554
Blank_B20_ELFN2D1	ERS3605555
Blank_B21_ELFN2D1	ERS3605556
